# Supplementary material
Source: Springer Nature journal article supplement (https://www.springermedizin.de/resource/supplementary/12871_2008_61_MOESM2_ESM.pdf/9429572)

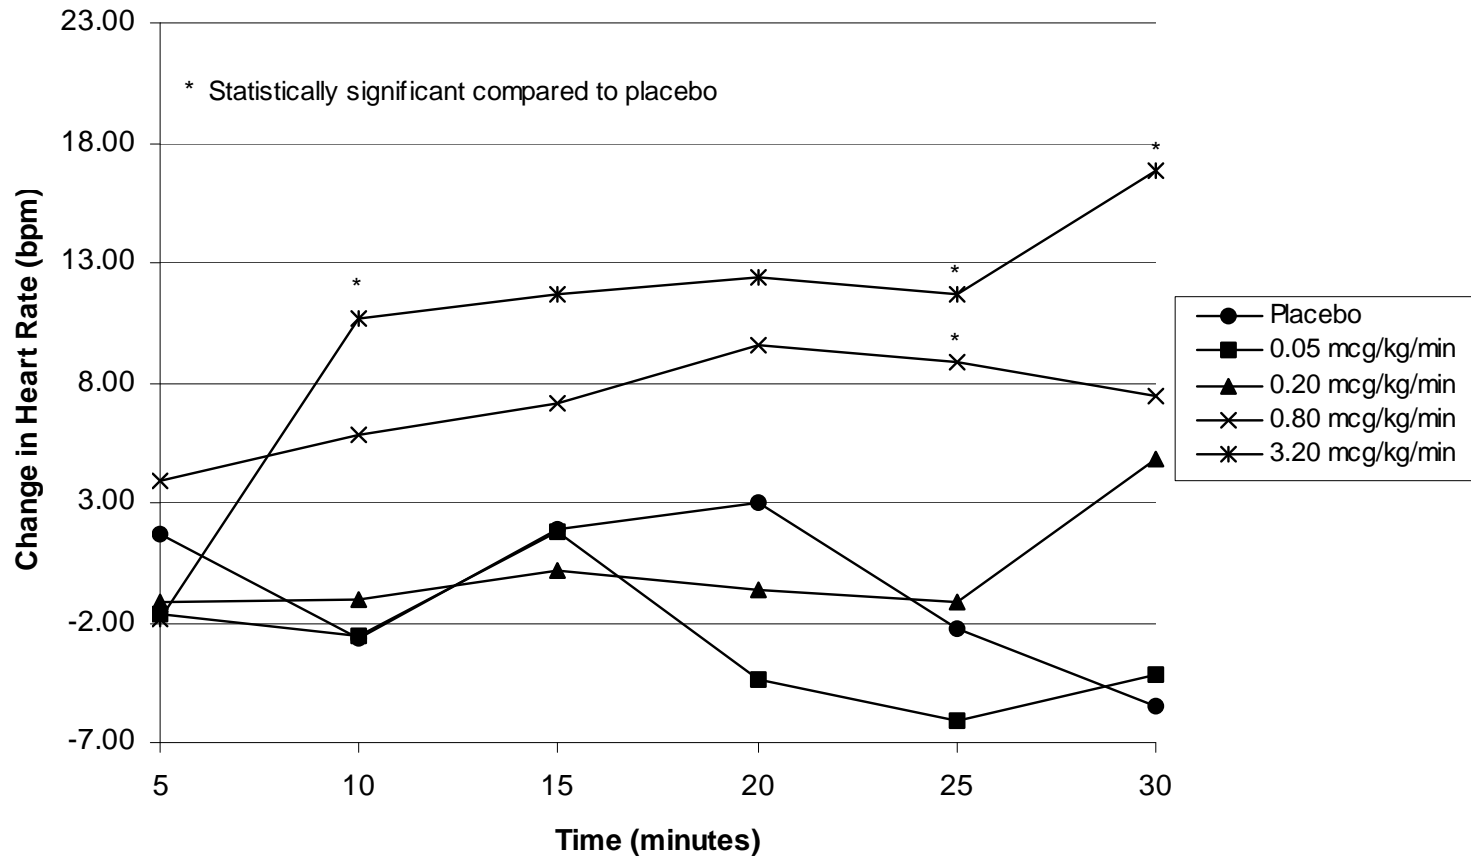

Supplement: MOESM2 [file 9429572]
